# Supplementary material for: Planar hexacoordinate gallium
Source: PubMed Central journal article supplement — Chem Sci. 2021 Oct 26;12(45):15067–76. doi: 10.1039/d1sc05089c (PMC8612373; doi:10.1039/d1sc05089c), 2021-10-26
Supplement: SC-012-D1SC05089C-s003.pdf [file SC-012-D1SC05089C-s003.pdf]

## Supporting Information

### Planar Hexacoordinate Gallium

Meng-hui Wang,<sup>a</sup> Chen Chen,<sup>a</sup> Sudip Pan<sup>\*b,c</sup> and Zhong-hua Cui,<sup>\*a,d</sup>

*<sup>a</sup>Institute of Atomic and Molecular Physics, Key Laboratory of Physics and  
Technology for Advanced Batteries (Ministry of Education), Jilin University,  
Changchun, China*

*E-mail: [zcui@jlu.edu.cn](mailto:zcui@jlu.edu.cn)*

*<sup>b</sup>Institute of Advanced Synthesis, School of Chemistry and Molecular Engineering,  
Jiangsu National Synergetic Innovation Center for Advanced Materials, Nanjing Tech  
University, Nanjing, China*

*<sup>c</sup>Fachbereich Chemie, Philipps-Universität Marburg, Hans-Meerwein-Strasse 4,  
35032 Marburg, Germany*

*E-mail: [pans@chemie.uni-marburg.de](mailto:pans@chemie.uni-marburg.de)*

*<sup>d</sup>Beijing National Laboratory for Molecular Sciences*

|                |       |                                                                                   |                                                                                    |            |
|----------------|-------|-----------------------------------------------------------------------------------|------------------------------------------------------------------------------------|------------|
| Top            |       | 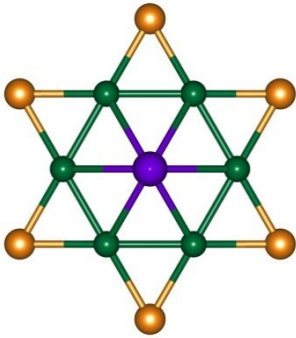 |  |            |
| Side           |       |  |  |            |
|                |       | $C_{6v}, {}^1A_1$                                                                 | $D_{6h}, {}^1A_{1g}$                                                               | $\Delta E$ |
| $AlBe_6Au_6^+$ | PBE0  | -1145.204187 (11.9)                                                               | -1145.196027 (90.2 <i>i</i> )                                                      | 5.1        |
|                | B3LYP | -1145.812671 (10.9)                                                               | -1145.806572 (81.4 <i>i</i> )                                                      | 3.8        |
|                | TPSS  | -1145.406239 (10.7)                                                               | -1145.399284 (85.3 <i>i</i> )                                                      | 4.4        |
| $GaBe_6Au_6^+$ | PBE0  | –                                                                                 | -2827.508146 (8.0)                                                                 |            |
|                | B3LYP | –                                                                                 | -2828.289040 (14.3)                                                                |            |
|                | TPSS  | –                                                                                 | -2827.822827 (13.7)                                                                |            |
| $InBe_6Au_6^+$ | PBE0  | -1093.027070 (14.3)                                                               | -1093.022396 (22.0 <i>i</i> )                                                      | 2.9        |
|                | B3LYP | -1093.571649 (13.4)                                                               | -1093.568520 (17.1 <i>i</i> )                                                      | 2.0        |
|                | TPSS  | -1093.020139 (13.3)                                                               | -1093.016094 (20.0 <i>i</i> )                                                      | 2.5        |
| $TlBe_6Au_6^+$ | PBE0  | –                                                                                 | -1075.397122 (15.0)                                                                |            |
|                | B3LYP | –                                                                                 | -1075.939462 (16.1)                                                                |            |
|                | TPSS  | –                                                                                 | -1075.420601 (14.3)                                                                |            |

**Figure S1.** The absolute energy in (a.u.) and relative energy in kcal/mol ( $\Delta E$ ) of the quasi-phE and perfectly phE of  $EBe_6Au_6^+$  ( $X=Al, Ga, In, Tl$ ) computed by different DFT methods with def2-TZVP basis sets. All energies are corrected for zero-point energies (ZPE) at the corresponding DFT level. The minimum frequencies in  $cm^{-1}$  are given in bracket. For  $E = Ga$  and  $Tl$ , the corresponding  $C_{6v}$  isomer cannot be located as it automatically converges to  $D_{6h}$  isomer.

|                            | Lower-energy minimum                                                                | Saddle point                                                                        | →Local minimum                                                                       |
|----------------------------|-------------------------------------------------------------------------------------|-------------------------------------------------------------------------------------|--------------------------------------------------------------------------------------|
|                            | 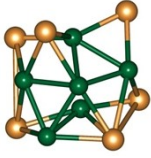   |    |   |
| $\text{Be}_6\text{Au}_6$   | $C_1, {}^1A$<br>0.0 (19.1)                                                          | $D_{6h}, {}^1A_{1g}$<br>165.8 (Nimag=3)                                             | $C_1, {}^1A$<br>98.3 (16.5)                                                          |
|                            |    |    |   |
| $\text{Be}_6\text{Au}_6^-$ | $C_1, {}^1A$<br>0.0 (5.1)                                                           | $D_{6h}, {}^1A_{1g}$<br>88.2 (Nimag=5)                                              | $C_1, {}^1A$<br>20.1 (10.7)                                                          |
|                            |  |  |  |
| $\text{Be}_6\text{Au}_6^+$ | $C_1, {}^1A$<br>0.0 (19.1)                                                          | $C_{2v}, {}^1A_1$<br>39.1 (Nimag=4)                                                 | $C_1, {}^1A$<br>13.5 (7.1)                                                           |

**Figure S2.** Structures and relative energies in kcal/mol of the neutral and charged  $\text{Be}_6\text{Au}_6$  systems computed at the PBE0/def2-TZVP level. All energies are corrected for zero-point energies (ZPE). The frequencies given in the parenthesis ( $\text{cm}^{-1}$ ) and Nimag refers to the numbers of imaginary frequencies.

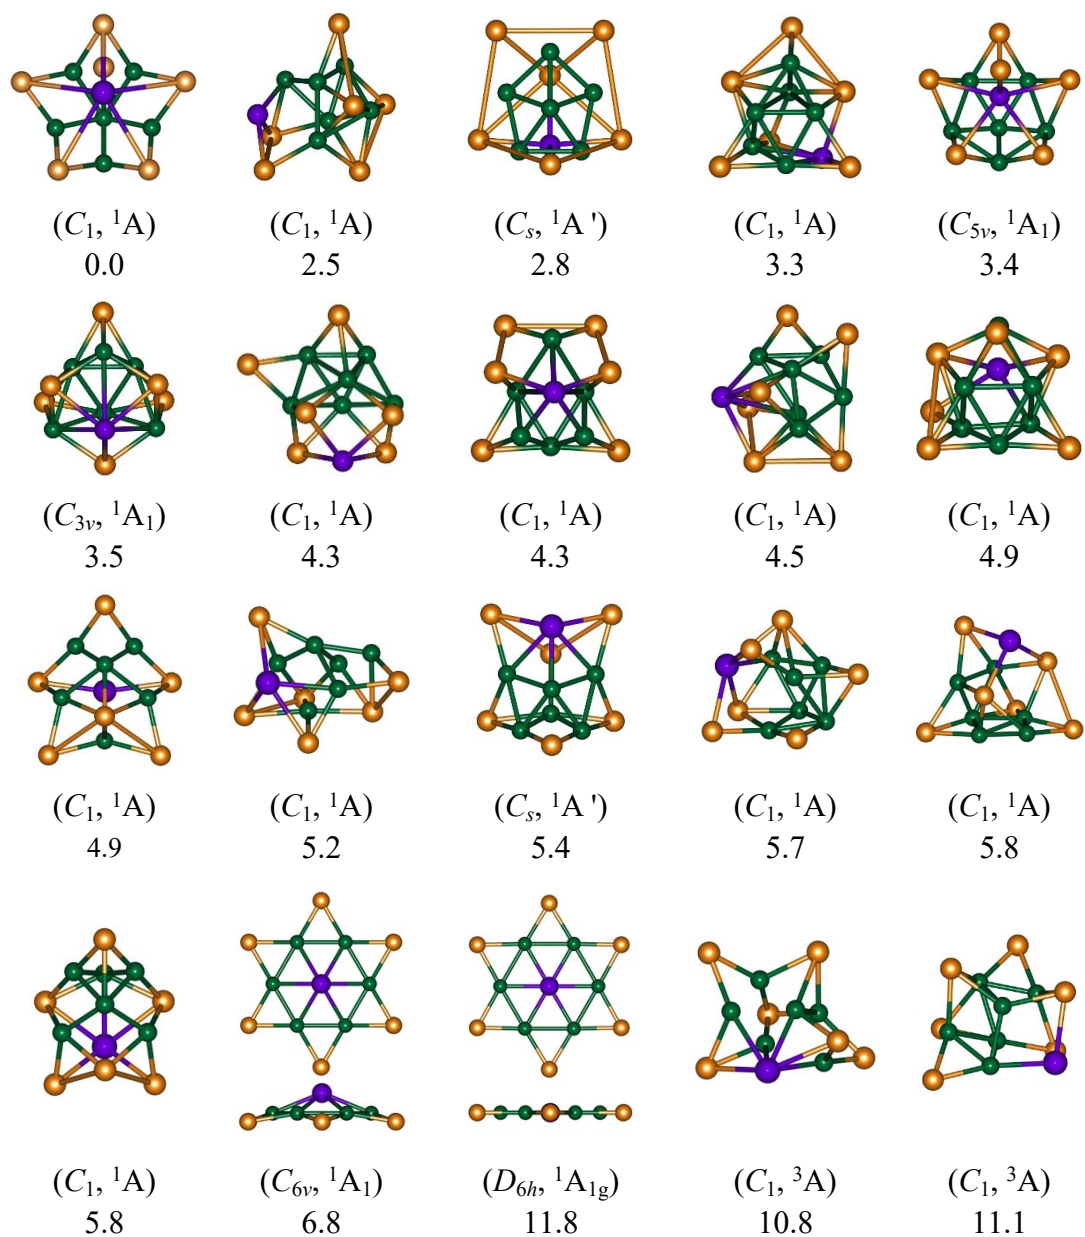

**Figure S3.** Calculated structures of  $\text{AlBe}_6\text{Au}_6^+$  at the PBE0/def2-TZVP level. The relative energies of the structures were given in kcal/mol, point group and spectroscopic states were given in parenthesis. “\*” refer to the structure with an imaginary frequency.

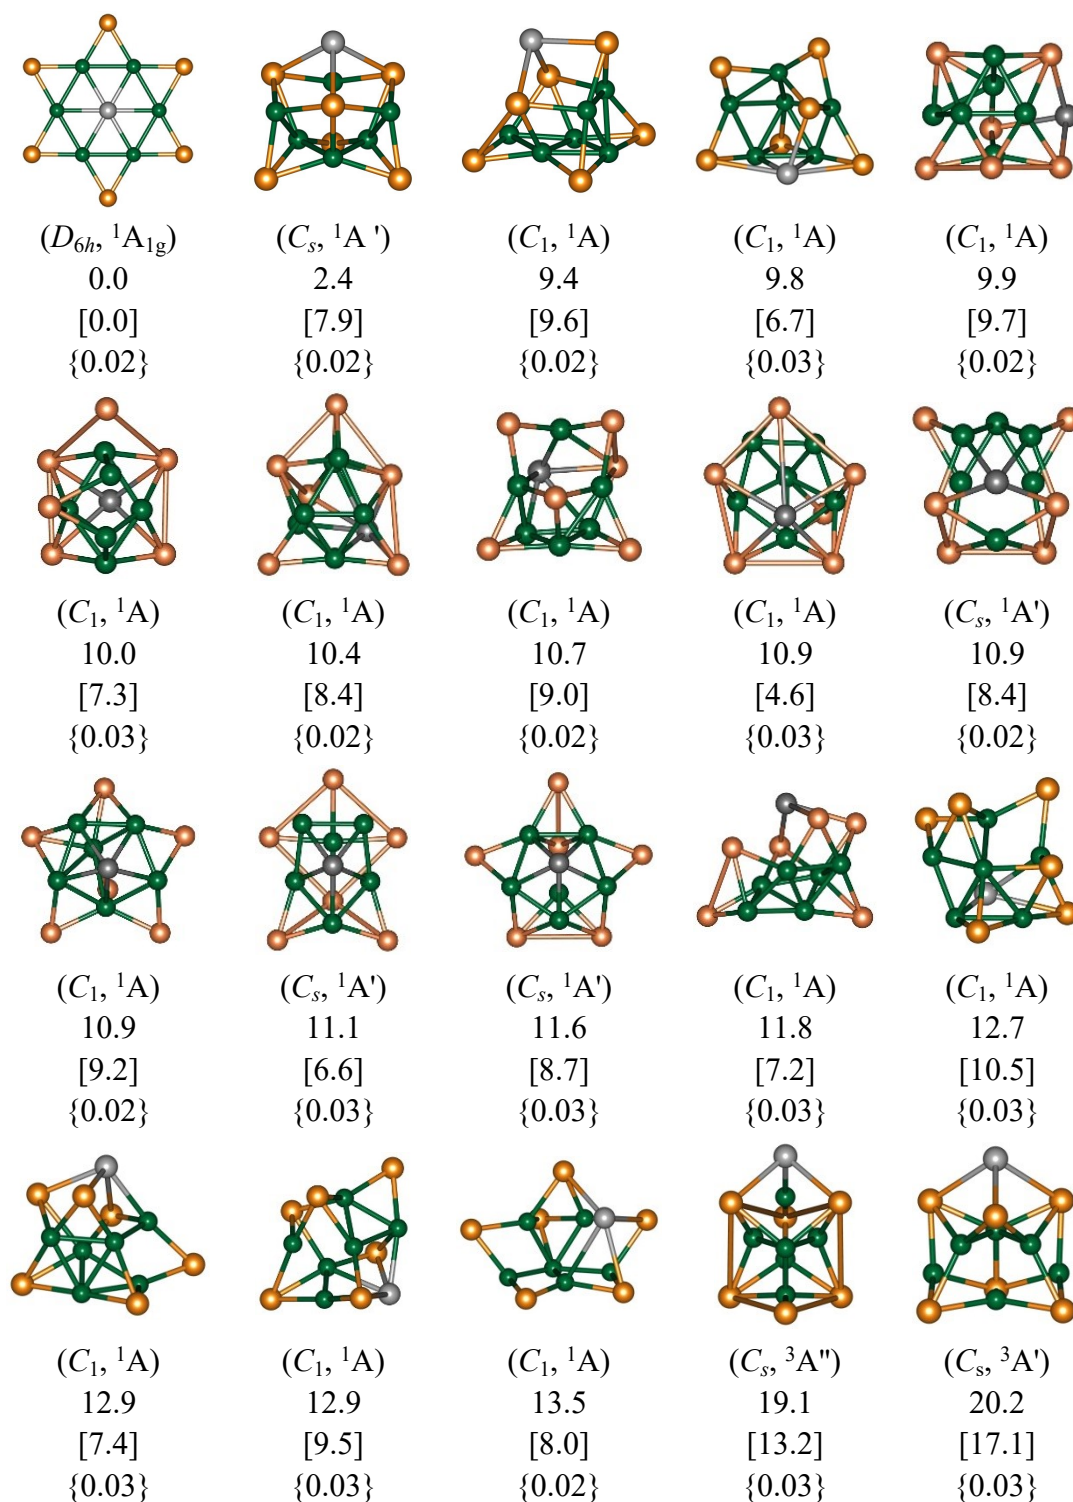

**Figure S4.** Structures and relative energies in kcal/mol of the low-lying isomers of  $\text{GaBe}_6\text{Au}_6^+$  computed at the single-point CCSD(T)/def2-TZVP//PBE0/def2-TZVP and PBE0/def2-TZVP (in square brackets) levels. All energies are corrected for zero-point energies (ZPE) at the PBE0/def2-TZVP level. The point group symmetries and spectroscopic states are given, and T1 Diagnostic is given in braces.

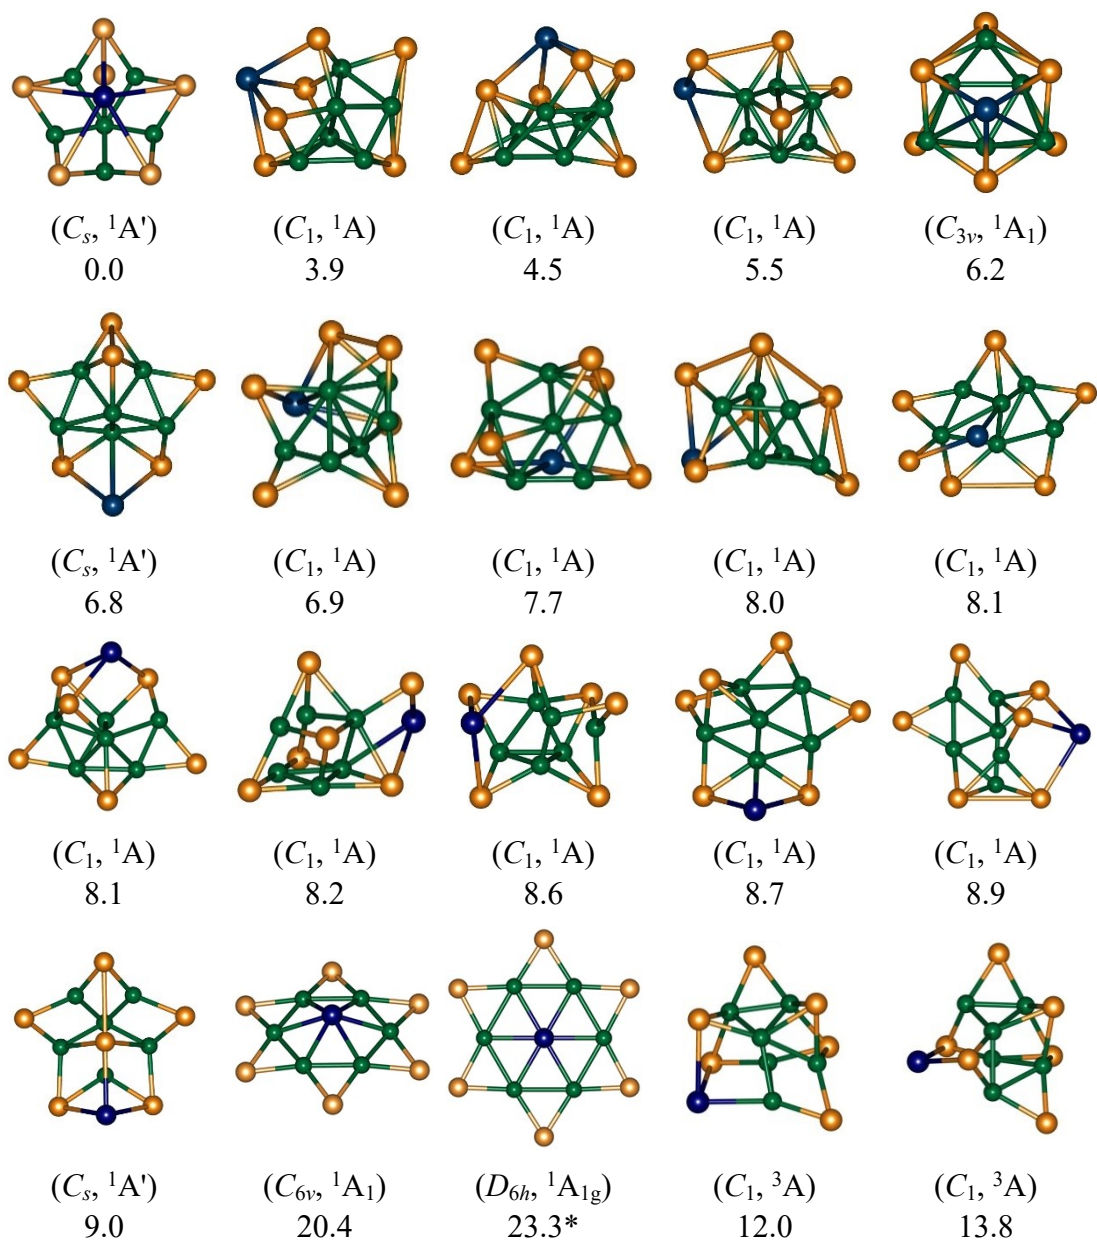

**Figure S5.** Calculated structures of  $\text{InBe}_6\text{Au}_6^+$  at the PBE0/def2-TZVP level. The relative energies of the structures were given in kcal/mol, point group and spectroscopic states were given in parenthesis. “\*” refer to the structure with an imaginary frequency.

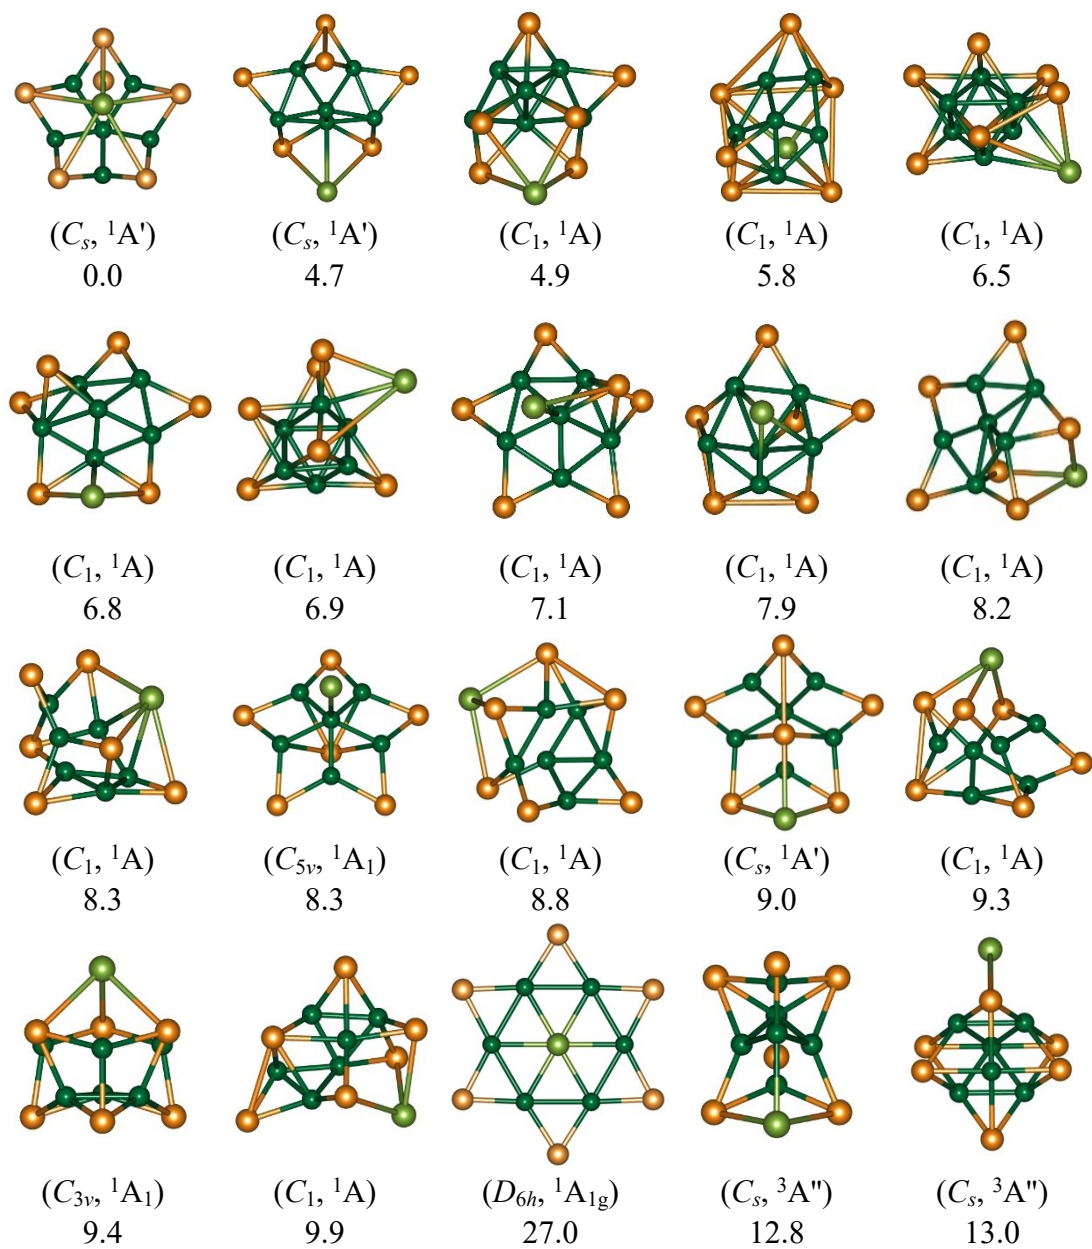

**Figure S6.** Calculated structures of  $TlBe_6Au_6^+$  at the PBE0/def2-TZVP level. The relative energies of the structures were given in kcal/mol, point group and spectroscopic states were given in parenthesis.

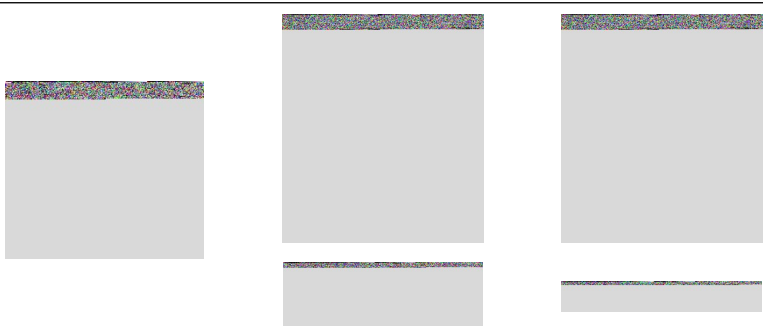

|                | $C_s, {}^1A'$    | $C_{6v}, {}^1A_1$ | $D_{6h}, {}^1A_{1g}$ |
|----------------|------------------|-------------------|----------------------|
| $AlBe_6Au_6^+$ | 0.0 <sup>#</sup> | 6.7               | 11.8*                |
| $GaBe_6Au_6^+$ | 4.6 <sup>#</sup> | –                 | 0.0                  |
| $InBe_6Au_6^+$ | 0.0              | 20.4              | 23.3*                |
| $TlBe_6Au_6^+$ | 0.0              | –                 | 27.0                 |

**Figure S7.** Structures and relative energies in kcal/mol of  $EBe_6Au_6^+$  (E = Al, Ga, In, Tl) computed at the PBE0/def2-TZVP level. All energies are corrected for zero-point energies (ZPE). “#” refers to the structure with  $C_1$  point group symmetry, “\*” refers to the structure with an imaginary frequency, and “–” means that the structure change into the perfectly planar configuration.

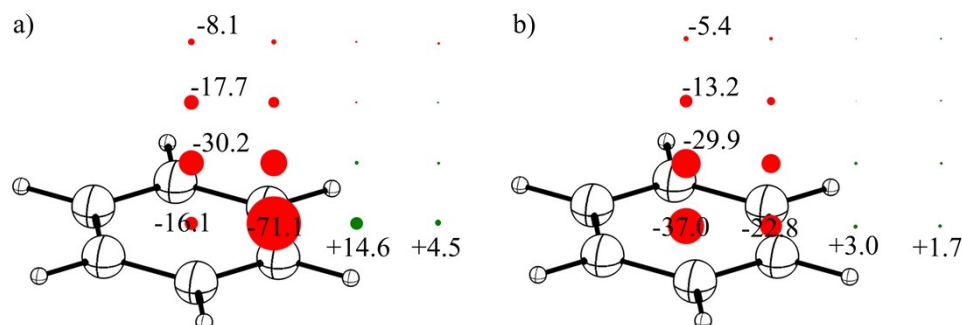

**Figure S8.** a)  $NICS_{zz}$  and b)  $NICS_{zz}(\pi)$  of the benzene obtained at the PBE0/def2-TZVP level. Diatropic and paratropic tensors are shown in red and green, respectively. NICS values are in ppm.



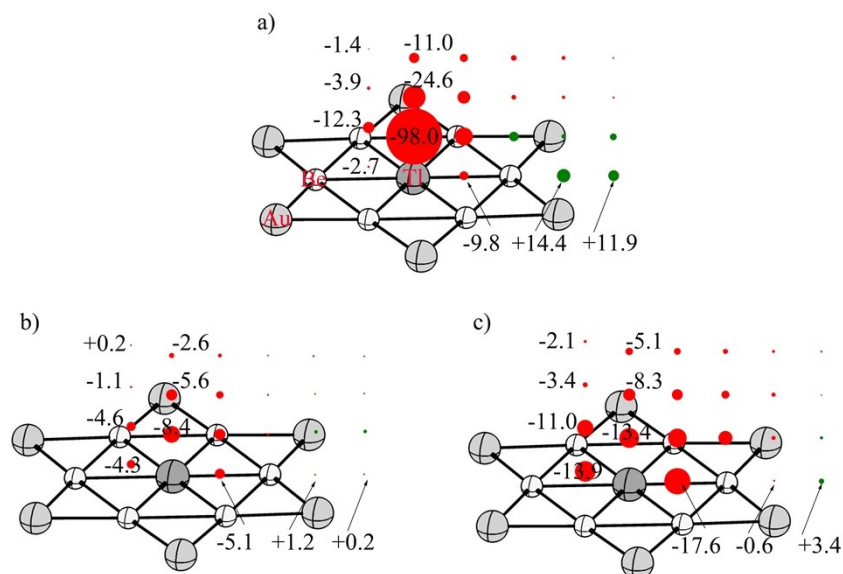

**Figure S9.** a) NICS<sub>zz</sub>, b) NICS<sub>zz</sub>( $\pi$ ), and c) NICS<sub>zz</sub>( $\sigma$ -delocalization) of the  $D_{6h}$   $\text{TlBe}_6\text{Au}_6^+$  obtained at the PBE0/def2-TZVP level (the values in left column refer to the center of Be-Tl-Be triangle). Diatropic and paratropic tensors are shown in red and green, respectively. NICS values are in ppm.

**Table S1.** The atomic charges (Q, in  $|e|$ ) analysis of  $\text{GaBe}_6\text{Au}_6^+$  computed at the PBE0/def2-TZVP level.

|                                    | $Q_{\text{Ga}}$ | $Q_{\text{Be}}$ | $Q_{\text{Au}}$ |
|------------------------------------|-----------------|-----------------|-----------------|
| NPA <sup>a</sup>                   | -3.28           | +0.94           | -0.23           |
| Hirshfeld <sup>b</sup>             | -0.06           | -0.01           | +0.18           |
| SCPA <sup>c</sup>                  | -0.10           | +0.13           | +0.06           |
| Becke <sup>d</sup>                 | -1.07           | +0.69           | -0.34           |
| MK <sup>e</sup> /RESP <sup>f</sup> | +0.64           | -0.31           | +0.37           |
| ESP <sup>g</sup>                   | +0.73           | -0.31           | +0.36           |
| Mulliken <sup>h</sup>              | +1.18           | -0.30           | +0.27           |

<sup>a</sup>Natural population analysis (NPA) charge

<sup>b</sup>Hirshfeld atomic charge

<sup>c</sup>Modified Mulliken atom population defined by Ros & Schuit (SCPA)

<sup>d</sup>Becke atomic charge with atomic dipole moment correction

<sup>e</sup>Merz-Kollmann (MK) ESP fitting atomic charge

<sup>f</sup>Restrained ElectroStatic Potential (RESP) atomic charge

<sup>g</sup>ElectroStatic Potential (ESP) atomic charge

<sup>h</sup>Mulliken atomic charge

**Table S2.** The EDA results of  $\text{GaBe}_6\text{Au}_6^+$  cluster considering Ga and  $\text{Be}_6\text{Au}_6$  in different charge and electronic states as interacting fragments at the PBE0/TZ2P-ZORA//PBE0/def2-ZVP level.

| Energy                     | Ga (D, $4s^24p_z^1$ )<br>+ $\text{Be}_6\text{Au}_6^+$ (D)                           | Ga (D, $4s^14p_z^2$ )<br>+ $\text{Be}_6\text{Au}_6^+$ (D)                              | Ga (Q, $4s^04p_z^14p_x^14p_y^1$ )<br>+ $\text{Be}_6\text{Au}_6^+$ (Q)                  | $\text{Ga}^-$ (S, $4s^24p_z^2$ )<br>+ $\text{Be}_6\text{Au}_6^{2+}$ (S)                | $\text{Ga}^-$ (Q, $4s^14p_z^14p_x^14p_y^1$ )<br>+ $\text{Be}_6\text{Au}_6^{2+}$ (Q) |
|----------------------------|-------------------------------------------------------------------------------------|----------------------------------------------------------------------------------------|----------------------------------------------------------------------------------------|----------------------------------------------------------------------------------------|-------------------------------------------------------------------------------------|
| $\Delta E_{\text{int}}$    | -261.6                                                                              | -352.6                                                                                 | -442.4                                                                                 | -467.1                                                                                 | -491.3                                                                              |
| $\Delta E_{\text{Pauli}}$  | 137.1                                                                               | 137.7                                                                                  | 356.7                                                                                  | 139.0                                                                                  | 534.1                                                                               |
| $\Delta E_{\text{elstat}}$ | -137.5                                                                              | -201.5                                                                                 | -477.0                                                                                 | -321.8                                                                                 | -657.6                                                                              |
| $\Delta E_{\text{orb}}$    | -261.1                                                                              | -288.8                                                                                 | -322.0                                                                                 | -284.2                                                                                 | -367.8                                                                              |
| Energy                     | $\text{Ga}^-$ (T, $4s^04p_z^24p_x^14p_y^1$ )<br>+ $\text{Be}_6\text{Au}_6^{2+}$ (T) | $\text{Ga}^{2-}$ (Q, $4s^24p_z^14p_x^14p_y^1$ )<br>+ $\text{Be}_6\text{Au}_6^{3+}$ (Q) | $\text{Ga}^{2-}$ (Q, $4s^24p_z^14p_x^14p_y^1$ )<br>+ $\text{Be}_6\text{Au}_6^{3+}$ (Q) | $\text{Ga}^{3-}$ (T, $4s^24p_z^24p_x^14p_y^1$ )<br>+ $\text{Be}_6\text{Au}_6^{4+}$ (T) |                                                                                     |
| $\Delta E_{\text{int}}$    | -635.0                                                                              | -834.5                                                                                 | -877.2                                                                                 | -1367.7                                                                                |                                                                                     |
| $\Delta E_{\text{Pauli}}$  | 444.8                                                                               | 789.0                                                                                  | 687.6                                                                                  | 875.8                                                                                  |                                                                                     |
| $\Delta E_{\text{elstat}}$ | -705.0                                                                              | -995.8                                                                                 | -1019.0                                                                                | -1470.7                                                                                |                                                                                     |
| $\Delta E_{\text{orb}}$    | -374.9                                                                              | -627.7                                                                                 | -545.8                                                                                 | -772.8                                                                                 |                                                                                     |

**Table S3.** The EDA-NOCV results of D6h symmetric EBe<sub>6</sub>Au<sub>6</sub><sup>+</sup> (E = Ga, In, Tl) cluster considering E (D, ns<sup>2</sup>np<sub>⊥</sub><sup>1</sup>) and Be<sub>6</sub>Au<sub>6</sub><sup>+</sup> (D) as interacting fragments at the PBE0/TZ2P-ZORA//PBE0/def2-ZVP level.

| Energy                                     | Interaction                                                                                     | Al (D, 3s <sup>2</sup> 3p <sub>⊥</sub> <sup>1</sup> ) +<br>Be <sub>6</sub> Au <sub>6</sub> <sup>+</sup> (D) | Ga (D, 4s <sup>2</sup> 4p <sub>⊥</sub> <sup>1</sup> ) +<br>Be <sub>6</sub> Au <sub>6</sub> <sup>+</sup> (D) | In (D, 5s <sup>2</sup> 5p <sub>⊥</sub> <sup>1</sup> ) +<br>Be <sub>6</sub> Au <sub>6</sub> <sup>+</sup> (D) | Tl (D, 6s <sup>2</sup> 6p <sub>⊥</sub> <sup>1</sup> ) +<br>Be <sub>6</sub> Au <sub>6</sub> <sup>+</sup> (D) |
|--------------------------------------------|-------------------------------------------------------------------------------------------------|-------------------------------------------------------------------------------------------------------------|-------------------------------------------------------------------------------------------------------------|-------------------------------------------------------------------------------------------------------------|-------------------------------------------------------------------------------------------------------------|
| $\Delta E_{\text{int}}$                    | –                                                                                               | -253.5                                                                                                      | -261.6                                                                                                      | -229.6                                                                                                      | -220.1                                                                                                      |
| $\Delta E_{\text{Pauli}}$                  | –                                                                                               | 114.2                                                                                                       | 137.1                                                                                                       | 178.1                                                                                                       | 214.5                                                                                                       |
| $\Delta E_{\text{elstat}}^{[a]}$           | –                                                                                               | -115.7 (31.5%)                                                                                              | -137.5 (34.5%)                                                                                              | -169.4 (41.6%)                                                                                              | -200.1 (46.0%)                                                                                              |
| $\Delta E_{\text{orb}}^{[a]}$              | –                                                                                               | -251.9 (68.5%)                                                                                              | -261.1 (65.5%)                                                                                              | -238.3 (58.4%)                                                                                              | -234.5 (54.0%)                                                                                              |
| $\Delta E_{\text{orb}(1)}^{[b]}$           | E(p <sub>⊥</sub> )–[Be <sub>6</sub> Au <sub>6</sub> <sup>+</sup> ] electron-sharing $\pi$ -bond | -47.8 (19.0%)                                                                                               | -50.7 (19.4%)                                                                                               | -49.3 (20.7%)                                                                                               | -51.1 (21.8%)                                                                                               |
| $\Delta E_{\text{orb}(2)}^{[b]}$           | E(s)→[Be <sub>6</sub> Au <sub>6</sub> <sup>+</sup> ] $\sigma$ -backdonation                     | -84.5 (33.5%)                                                                                               | -78.5 (30.1%)                                                                                               | -74.6 (31.3%)                                                                                               | -63.8 (27.2%)                                                                                               |
| $\Delta E_{\text{orb}(3)}^{[b]}$           | E(p <sub>  </sub> )←[Be <sub>6</sub> Au <sub>6</sub> <sup>+</sup> ] $\sigma$ -donation          | -55.5 (22.0%)                                                                                               | -61.0 (23.4%)                                                                                               | -50.8 (21.3%)                                                                                               | -50.2 (21.4%)                                                                                               |
| $\Delta E_{\text{orb}(4)}^{[b]}$           | E(p <sub>  </sub> )←[Be <sub>6</sub> Au <sub>6</sub> <sup>+</sup> ] $\sigma$ -donation          | -55.3 (22.0%)                                                                                               | -60.8 (23.3%)                                                                                               | -50.6 (21.2%)                                                                                               | -50.1 (21.4%)                                                                                               |
| $\Delta E_{\text{orb}(\text{rest})}^{[b]}$ | –                                                                                               | -8.8 (3.5%)                                                                                                 | -10.1 (3.9%)                                                                                                | -13.0 (5.5%)                                                                                                | -19.3 (8.2%)                                                                                                |
| $\Delta E_{\text{Steric}}$                 |                                                                                                 | -1.5                                                                                                        | -0.4                                                                                                        | 8.7                                                                                                         | 14.4                                                                                                        |

<sup>[a]</sup>The percentage contribution with respect to total attraction is given in parentheses; <sup>[b]</sup>The percentage contribution in parentheses is given with respect to total orbital interaction.

**Table S4.** The EDA results for  $E\text{Be}_6\text{Au}_6^+$  ( $E = \text{In, Tl}$ ) cluster taking  $E$  ( $D, ns^2np_{\perp}^1$ ) as one fragment and  $\text{Be}_6\text{Au}_6^+$  ( $D$ ) as another fragment at the PBE0/TZ2P-ZORA//PBE0/def2-TZVP level.

| Energy                     | $\text{InBe}_6\text{Au}_6^+$ |          | $\text{TlBe}_6\text{Au}_6^+$ |          |
|----------------------------|------------------------------|----------|------------------------------|----------|
|                            | $D_{6h}$                     | $C_{6v}$ | $D_{6h}$                     | $C_{6v}$ |
| $\Delta E_{\text{int}}$    | -229.6                       | -234.1   | -220.1                       | -219.3   |
| $\Delta E_{\text{Pauli}}$  | 178.1                        | 186.0    | 214.5                        | 219.2    |
| $\Delta E_{\text{elstat}}$ | -169.4                       | -171.2   | -200.1                       | -195.5   |
| $\Delta E_{\text{orb}}$    | -238.3                       | -248.9   | -234.5                       | -243.0   |
| $\Delta E_{\text{Steric}}$ | 8.7                          | 14.8     | 14.4                         | 23.7     |

The lowest vibrational frequencies ( $\nu_{\min}$ ), the corresponding energies and the cartesian coordinates of the low-lying energy isomers with  $\text{GaBe}_6\text{Au}_6^+$  obtained at the PBE0/def2-TZVP level.

| <b>Isomer-a</b>                        |                 |                 |                 |
|----------------------------------------|-----------------|-----------------|-----------------|
| $\nu_{\min} = 8.0365 \text{ cm}^{-1}$  |                 |                 |                 |
| HF = -2827.529234 a.u.                 |                 |                 |                 |
| Au                                     | 0.000000000000  | -3.832243000000 | 0.000000000000  |
| Au                                     | 3.318820000000  | -1.916122000000 | 0.000000000000  |
| Au                                     | 3.318820000000  | 1.916122000000  | 0.000000000000  |
| Au                                     | 0.000000000000  | 3.832243000000  | 0.000000000000  |
| Au                                     | -3.318820000000 | 1.916122000000  | 0.000000000000  |
| Au                                     | -3.318820000000 | -1.916122000000 | 0.000000000000  |
| Be                                     | -1.114577000000 | -1.930504000000 | 0.000000000000  |
| Be                                     | 1.114577000000  | -1.930504000000 | 0.000000000000  |
| Be                                     | 2.229155000000  | 0.000000000000  | 0.000000000000  |
| Be                                     | 1.114577000000  | 1.930504000000  | 0.000000000000  |
| Be                                     | -1.114577000000 | 1.930504000000  | 0.000000000000  |
| Be                                     | -2.229155000000 | 0.000000000000  | 0.000000000000  |
| Ga                                     | 0.000000000000  | 0.000000000000  | 0.000000000000  |
| <b>Isomer-b</b>                        |                 |                 |                 |
| $\nu_{\min} = 22.2548 \text{ cm}^{-1}$ |                 |                 |                 |
| HF = -2827.515782 a.u.                 |                 |                 |                 |
| Au                                     | 1.120577000000  | -1.940897000000 | 1.254061000000  |
| Au                                     | -2.241155000000 | 0.000000000000  | 1.254061000000  |
| Au                                     | 1.120577000000  | 1.940897000000  | 1.254061000000  |
| Au                                     | 2.490089000000  | 0.000000000000  | -1.559438000000 |
| Au                                     | -1.245044000000 | -2.156480000000 | -1.559438000000 |
| Au                                     | -1.245044000000 | 2.156480000000  | -1.559438000000 |
| Be                                     | 0.649113000000  | -1.124297000000 | -0.823031000000 |
| Be                                     | -1.298226000000 | 0.000000000000  | -0.823031000000 |
| Be                                     | 0.649113000000  | 1.124297000000  | -0.823031000000 |
| Be                                     | 2.129959000000  | 0.000000000000  | 0.667849000000  |
| Be                                     | -1.064980000000 | -1.844599000000 | 0.667849000000  |
| Be                                     | -1.064980000000 | 1.844599000000  | 0.667849000000  |
| Ga                                     | 0.000000000000  | 0.000000000000  | 2.678862000000  |
| <b>Isomer-c</b>                        |                 |                 |                 |
| $\nu_{\min} = 25.7784 \text{ cm}^{-1}$ |                 |                 |                 |
| HF = -2827.513433 a.u.                 |                 |                 |                 |
| Au                                     | -1.107633000000 | 2.233098000000  | -1.507020000000 |
| Au                                     | -1.636274000000 | -0.921900000000 | -1.043417000000 |
| Au                                     | 1.791205000000  | -1.349233000000 | -1.855532000000 |
| Au                                     | -2.842952000000 | 0.113101000000  | 1.514388000000  |

|    |                 |                 |                 |
|----|-----------------|-----------------|-----------------|
| Au | 1.009685000000  | -1.196823000000 | 1.884037000000  |
| Au | 2.638836000000  | 1.911002000000  | 0.935943000000  |
| Be | -1.076828000000 | 0.876177000000  | 0.367687000000  |
| Be | 1.720514000000  | 0.006102000000  | -0.082528000000 |
| Be | 0.726923000000  | 1.882263000000  | -0.280934000000 |
| Be | 0.720374000000  | 1.000678000000  | 1.686633000000  |
| Be | 0.191519000000  | 0.302025000000  | -1.578045000000 |
| Be | -0.913441000000 | -0.084130000000 | 2.511230000000  |
| Ga | 0.198300000000  | -2.525252000000 | -0.156121000000 |

**Isomer-d**

$\nu_{\min} = 17.8219 \text{ cm}^{-1}$

HF = -2827.518542 a.u.

|    |                 |                 |                 |
|----|-----------------|-----------------|-----------------|
| Au | 2.729802000000  | -0.631686000000 | -1.567647000000 |
| Au | 1.592595000000  | 2.555402000000  | 1.389479000000  |
| Au | 0.766738000000  | -1.506444000000 | 2.400824000000  |
| Au | -1.986683000000 | 2.055402000000  | -1.074604000000 |
| Au | -3.005237000000 | -0.783394000000 | 0.643976000000  |
| Au | -0.249738000000 | -1.955469000000 | -1.099232000000 |
| Be | -1.591458000000 | 0.889059000000  | 0.769219000000  |
| Be | 0.542262000000  | 0.563538000000  | 1.408113000000  |
| Be | 0.048257000000  | 1.981740000000  | -0.186823000000 |
| Be | 1.357471000000  | -1.063449000000 | 0.218673000000  |
| Be | -0.850119000000 | -1.189675000000 | 0.915498000000  |
| Be | 1.869770000000  | 0.954208000000  | -0.245489000000 |
| Ga | 0.211116000000  | 0.402816000000  | -2.137021000000 |

**Isomer-e**

$\nu_{\min} = 22.7693 \text{ cm}^{-1}$

HF = -2827.509002 a.u.

|    |                 |                 |                 |
|----|-----------------|-----------------|-----------------|
| Au | 1.737733303483  | 1.457311185056  | -1.765774825003 |
| Au | 2.412104385564  | -2.150416702597 | 0.000000000000  |
| Au | 1.737733303483  | 1.457311185056  | 1.765774825003  |
| Au | -3.639818992789 | 1.170244243609  | 0.000000000000  |
| Au | -1.168665136247 | -1.511918649720 | -1.806786941428 |
| Au | -1.168665136247 | -1.511918649720 | 1.806786941428  |
| Be | -0.118652194684 | 0.377197082754  | -1.041936955776 |
| Be | 0.282769306971  | -1.500679422341 | 0.000000000000  |
| Be | 1.767729844149  | -0.020546627793 | 0.000000000000  |
| Be | -1.925234289480 | -0.264694613885 | 0.000000000000  |
| Be | -1.527921424850 | 1.758590922053  | 0.000000000000  |
| Be | -0.118652194684 | 0.377197082754  | 1.041936955776  |
| Ga | 0.470412954209  | 3.018038054952  | 0.000000000000  |
